# Supplementary material for: Dissecting a Hidden Gene Duplication: The Arabidopsis thaliana SEC10 Locus
Source: PLOS journal article supplement (doi:10.1371/journal.pone.0094077), 2014-04-11
Supplement: S3 (10.1371/journal.pone.0094077.s003) [file journal.pone.0094077.s003]

|             |     |                                                                   |     |
|-------------|-----|-------------------------------------------------------------------|-----|
| NP_568270.3 | 1   | MTEGIRARGPRSSSVNSVPLILDIEDFKGDFSFDALFGNLVNDLLPSFLDEEADSGDGHG      | 60  |
| AK222187    | 1   | MTEGIRARGPRSSSVNSVPLILDIEDFKGDFSFDALFGNLVNDLLPSFLDEEADSGDGHG      | 60  |
| AF479280    | 1   | MTERIRARGPRSSSVNSVPLILDIEDFKGDFSFDALFGNLVNDLLPSFLDEEADSGDGHG      | 60  |
| NP_568270.3 | 61  | NIAGVDGLTNGHLRGQSAPLSSAPFFPEVDGLLSLFKDACKELVDLRKQVDGRLNTLKKE      | 120 |
| AK222187    | 61  | NIAGVDGLTNGHLRGQSAPLSSAPFFPEVDGLLSLFKDACKELVDLRKQVDGRLNTLKKE      | 120 |
| AF479280    | 61  | NIAGVDGLTNGHLRGQSAPLSSAPFFPEVDGLLSLFKDACKELVDLRKQVDGRLNTLKKE      | 120 |
| NP_568270.3 | 121 | VSTQDSKHKRTLTEIEKGVDGLFESFARLDGRISSVGQTAAKIGDHLQSADAQRETASQT      | 180 |
| AK222187    | 121 | VSTQDSKHKRTLTEIEKGVDGLFESFARLDGRISSVGQTAAKIGDHLQSADAQRETASQT      | 180 |
| AF479280    | 121 | VSTQDSKHKRTLTEIEKGVDGLFESFARLDGRISSVGQTAAKIGDHLQSADAQRETASQT      | 180 |
| NP_568270.3 | 181 | IDLIKYLMEFNGSPGDLMELSALFSDDSRVAAEASIAQKLRSFAEEDIGRQGASAAAGNA      | 240 |
| AK222187    | 181 | IDLIKYLMEFNGSPGDLMELSALFSDDSRVAAEASIAQKLRSFAEEDIGRQGASAAAGNA      | 240 |
| AF479280    | 181 | IDLIKYLMEFNGSPGDLMELSALFSDDSRVAAEASIAQKLRSFAEEDIGRQGASTAAGNA      | 240 |
| NP_568270.3 | 241 | TPGRGLEVAVANLQDYCNELENRLLSRFDAASQRRDLSTMSECAKILSQFNRGTSAMQHY      | 300 |
| AK222187    | 241 | TPGRGLEVAVANLQDYCNELENRLLSRFDAASQRRDLSTMSECAKILSQFNRGTSAMQHY      | 300 |
| AF479280    | 241 | TPGRGLEVAVANLQDYCNELENRLLSRFDAASQRRDLSTMSECAKILSQFNRGTSAMQHY      | 300 |
| NP_568270.3 | 301 | VATRPMFIDVEVMNSDIRLVLGDHGSGQSPSNVARGLSALFKEITDVRKEAATITAVFP       | 360 |
| AK222187    | 301 | VATRPMFIDVEVMNSDIRLVLGDHGSGQSPSNVARGLSALFKEITDVRKEAATITAVFP       | 360 |
| AF479280    | 301 | VATRPMFIDVEVMNSDIRLVLGDHGSGQSPSNVARGLSALFKEITDVRKEAATITAVFP       | 360 |
| NP_568270.3 | 361 | TPNEVMAILVQRVLEQRVTGILDKILAKPSLMSPPPVQEGGLLYLRMLAVAYERTQELA       | 420 |
| AK222187    | 361 | TPNEVMAILVQRVLEQRVTGILDKILAKPSLMSPPPVQEGGLLYLRMLAVAYERTQELA       | 420 |
| AF479280    | 361 | TPNEVMAILVQRVLEQRVTGILDKILAKPSLMSPPPVQEGGLLYLRMLAVAYERTQELA       | 420 |
| NP_568270.3 | 421 | KDLRAVGCGDLVDVLDLTSLSFSSHKDEYPEHERASLKQLYQAKMEELRAESQQVSESSGT     | 480 |
| AK222187    | 421 | KDLRAVGCGDLVDVLDLTSLSFSSHKDEYPEHERASLKQLYQAKMEELRAESQQVSESSGT     | 480 |
| AF479280    | 421 | KDLRAVGCGDLVDVLDLTSLSFSSHKDEYPEHERASLKQLYQAKMEELRAESQQVSESSGT     | 480 |
| NP_568270.3 | 481 | IGRSKGASISSSLQQISVTVVTD FVRWNEEAITRCTLFSSQPATLAANVKAIFTCLLDQV     | 540 |
| AK222187    | 481 | IGRSKGASISSSLQQISVTVVTD FVRWNEEAITRCTLFSSQPATLAANVKAIFTCLLDQV     | 540 |
| AF479280    | 481 | IGRSKGASISSSLQQISVTFVTE FVRWNEEAITRCTLFSSQPATLAANVKAIFTCLLDQV     | 540 |
| NP_568270.3 | 541 | SVYITEGLERARDSLSEAAALRERFVLG . . . . RRVAAAAASAAEAAAAAGESSFKSFMVA | 596 |
| AK222187    | 541 | SVYITEGLERARDSLSEAAALRERFVLG . . . . RRVAAAAASAAEAAAAAGESSFKSFMVA | 596 |
| AF479280    | 541 | SVYITEGLERARDSLSEAAALRERFVLGTSVSRVAAAAASAAEAAAAAGESSFKSFMVA       | 600 |
| NP_568270.3 | 597 | VQRCGSSVAIVQQYFANSISRLLLPVDGAHAASCEEMSTALSKAEAAAYKGLQQCIETVM      | 656 |
| AK222187    | 597 | VQRCGSSVAIVQQYFANSISRLLLPVDGAHAASCEEMSTALSKAEAAAYKGLQQCIETVM      | 656 |
| AF479280    | 601 | VQRCGSSVAIVQQYFANSISRLLLPVDGAHAASCEEMSTALSKAEAAAYKGLQQCIETVM      | 660 |
| NP_568270.3 | 657 | AEVDRLLSSEQKSTDYRSDDG IASDHRPTNACIRVVAYLSRVLESFAFTALEGLNKQAF L    | 716 |
| AK222187    | 657 | AEVDRLLSSEQKSTDYRSDDG IASDHRPTNACIRVVAYLSRVLESFAFTALEGLNKQAF L    | 716 |
| AF479280    | 661 | AEVDRLLSSEQKSTDYRSPDDG IASDHRPTNACIRVVAYLSRVLESFAFTALEGLNKQAF L   | 720 |
| NP_568270.3 | 717 | TELGNRLEKLLLTHWQKFTFNPSGGLRLKRDLNEYVGFVKSFSGAPSVDEKFELLG I IANV   | 776 |
| AK222187    | 717 | TELGNRLEKLLLTHWQKFTFNPSGGLRLKRDLNEYVGFVKSFSGAPSVDEKFELLG I IANV   | 776 |
| AF479280    | 721 | TELGNRLEKLLLTHWQKFTFNPSGGLRLKRDLNEYVGFVKSFSGAPSVDEKFELLG I IANV   | 780 |
| NP_568270.3 | 777 | FIVAPDSLPTLFEGSPSIRKDAQRF IQLREDYKSAKLATKLSSLWPSLS                | 825 |
| AK222187    | 777 | FIVAPDSLPTLFEGSPSIRKDAQRF IQLREDYKSAKLATKLSSLWPSLS                | 825 |
| AF479280    | 781 | FIVAPDSLPTLFEGSPSIRKDAQRF IQLREDYKSAKLATKLSSLWPSLS                | 829 |

**Figure S3. Alignment of predicted SEC10a and SEC10b protein sequences.**

An alignment of predicted protein sequences of the AK222187 cDNA (*SEC10a*), AF479280 cDNA (*SEC10b*), and a conceptual protein NP\_568270.3 based on the reference cDNA sequence NM\_121275.4, corresponding to *SEC10a* by its coding sequence.
