# Supplementary material for: Dissecting a Hidden Gene Duplication: The Arabidopsis thaliana SEC10 Locus
Source: PLOS journal article supplement (doi:10.1371/journal.pone.0094077), 2014-04-11
Supplement: S4 (10.1371/journal.pone.0094077.s004) [file journal.pone.0094077.s004]

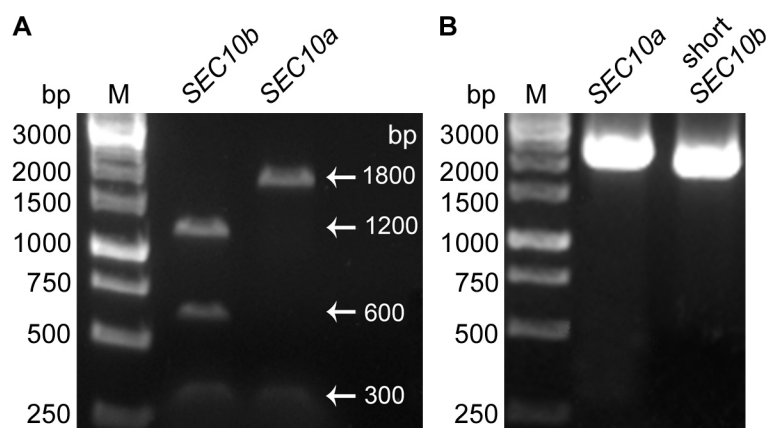

**Figure S4. Analysis of *SEC10* expression in *A. thaliana*.**

**(A)** Restriction patterns of *SEC10a* and *SEC10b* coding sequences after digestion with the *BpiI* restrictase. This restriction analysis was used to screen cloned amplicons obtained with paralog-indiscriminating primers.

**(B)** Two different types of PCR products were obtained after amplification of the *SEC10* coding sequence using paralog-indiscriminating primers and total cDNA extracted from the *sec10b-1* mutant as a template. The longer product corresponds to *SEC10a* and the shorter one to a shortened out-of-frame *SEC10b* version.
